# Supplementary material for: Single-Step Hydrolysis and Derivatization of Homocysteine Thiolactone Using Zone Fluidics: Simultaneous Analysis of Mixtures with Homocysteine Following Separation by Fluorosurfactant-Modified Gold Nanoparticles
Source: MDPI journal article supplement (doi:10.3390/molecules27072040), 2022-03-22
Supplement: s1 [file s1]

## Supplementary Material

# Single-Step Hydrolysis and Derivatization of Homocysteine Thiolactone Using Zone Fluidics: Simultaneous Analysis of Mixtures with Homocysteine Following Separation by Fluorosurfactant-Modified Gold Nanoparticles

Apostolia Tsiasioti <sup>1</sup>, Constantinos K. Zacharis <sup>2</sup> and Paraskevas D. Tzanavaras <sup>1,\*</sup>

<sup>1</sup> Laboratory of Analytical Chemistry, School of Chemistry, Faculty of Sciences, Aristotle University of Thessaloniki, 54124 Thessaloniki, Greece; atsiasioti@gmail.com

<sup>2</sup> Laboratory of Pharmaceutical Analysis, Department of Pharmaceutical Technology, School of Pharmacy, Aristotle University of Thessaloniki, 54124 Thessaloniki, Greece; czacharis@pharm.auth.gr

\* Correspondence: ptzanava@chem.auth.gr; Tel.: +30-23-1099-7721

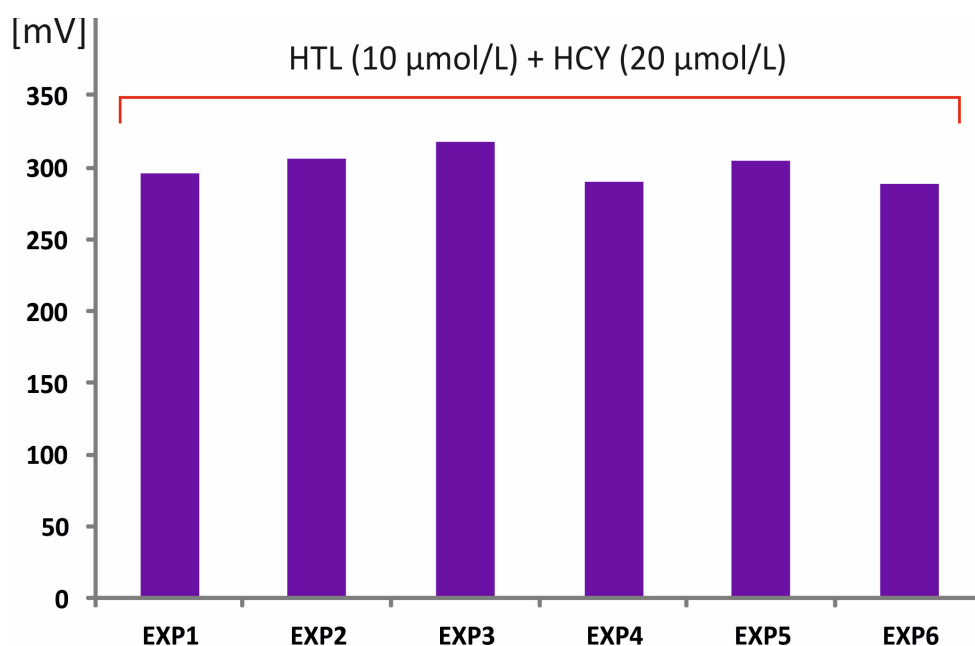

**Figure S1.** Repeatability of the removal of Homocysteine in the presence of Homocysteine thiolactone (six independent experiments, EXP1-EXP6).

**Table S1.** Composition of the artificial urine matrix.

| Species                         | Amount concentration<br>(mmol L <sup>-1</sup> ) |
|---------------------------------|-------------------------------------------------|
| Lactic acid                     | 1.1                                             |
| Citric acid                     | 2.0                                             |
| Sodium bicarbonate              | 25                                              |
| Urea                            | 170                                             |
| Calcium chloride                | 2.5                                             |
| Sodium chloride                 | 90                                              |
| Magnesium sulfate               | 2.0                                             |
| Sodium sulfate                  | 10                                              |
| Potassium hydrogen phosphate    | 7.0                                             |
| di-Potassium hydrogen phosphate | 7.0                                             |
| Ammonium chloride               | 25                                              |
